# Supplementary material
Source: PubMed Central journal article supplement (PMC2731115)

# Supplemental figure 1

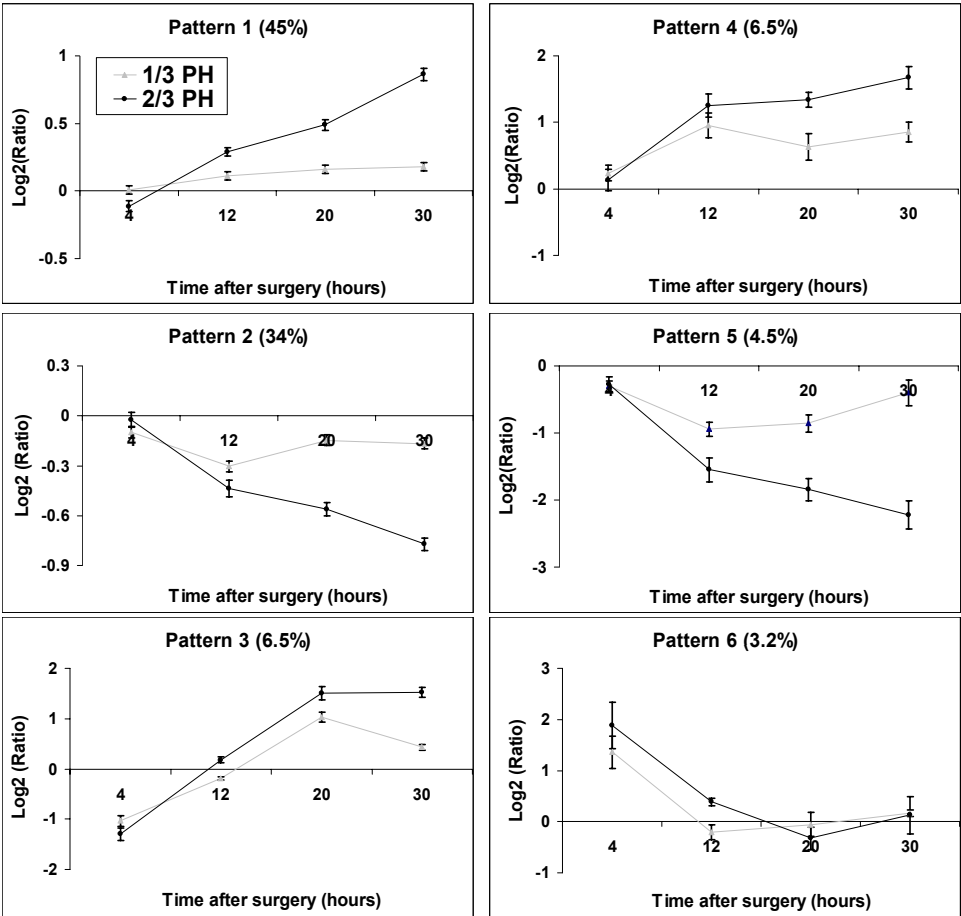

Supplement: ajpath.2009.090043_1.pdf [file ajpath.2009.090043_1.pdf]
